# Supplementary material for: Layer by layer assembly of heparin/layered double hydroxide completely renewable ultrathin films with enhanced strength and blood compatibility
Source: Royal Society of Chemistry journal article supplement (doi:10.1039/c2jm34728h), 2012-01-01
Supplement: c2jm34728h.pdf [file c2jm34728h.pdf]

## Supporting Information

### Layer by layer assembly of heparin/layered double hydroxide completely renewable ultrathin films with enhanced strength and blood compatibility

Yingqi Shu,<sup>a</sup> Penggang Yin,<sup>\*b</sup> Benliang Liang,<sup>b</sup> Shasheng wang,<sup>b</sup> Longcheng Gao,<sup>b</sup> Hao Wang<sup>\*a</sup> and Lin Guo<sup>\*b</sup>

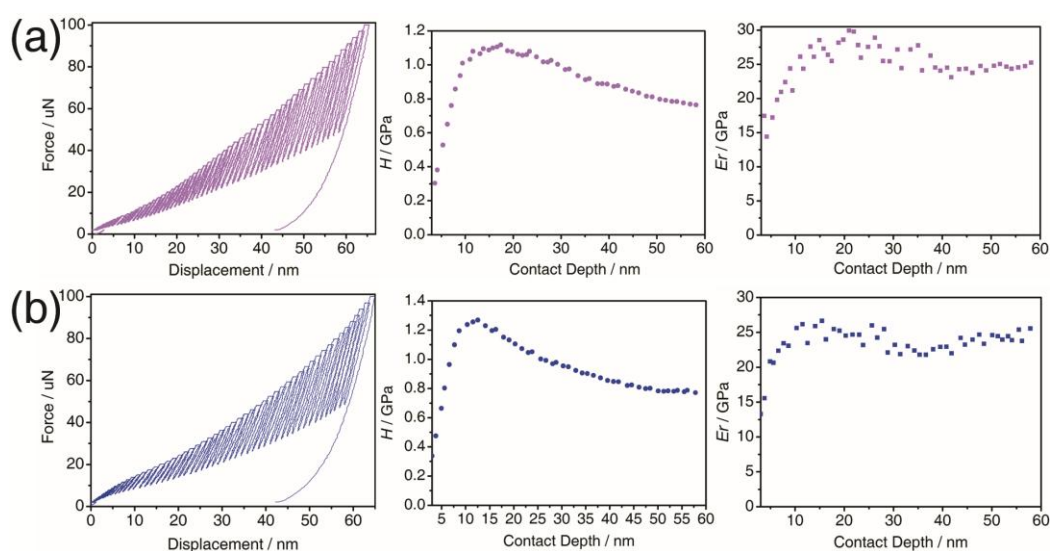

**Fig. S1** (a, b) Two of the partial unloading nanoindentation results.
